# Supplementary material
Source: publisher figshare collection journal article supplement (https://karger.figshare.com/ndownloader/files/22459886)
Supplement: Supplementary file 1 [file 22459886]

**Supplementary Table 2:** A standardized Echo acquisition to gather the necessary parameters detailed below for assessment using standardized software on standard echo images for subsequent Speckle tracking Echo (STE) analysis.

| **ECHO Views** | Data acquisition |
| --- | --- |
| **Parasternal Long axis** | - Aorta- Left atrium - Left ventricular (LV) measurements - LV outflow tract: diameter - Colour: Mitral and Aortic Valve |
|  |  |
| **Parasternal Short axis** | - LV: Mitral, mid ventricular and apical level - Valves (Tricuspid, Aorta and Pulmonary) with Colour and Colour Wave (CW) Doppler. |
|  |  |
| **Apical view** | - 4, 3 and 2 chamber view, Focus on LV - 4 and 2 chamber view, including left atrium - Pulse Wave (PW) Doppler – LV outflow tract behind aortic valve - PW Doppler (sample at tip of mitral leaflets) – transmitral flow - CW Doppler – trans- aortic velocity - Colour: Mitral, Aortic and Tricuspid Valve - Tissue Doppler Imaging (TDI): PW Doppler at mitral annulus (septal and lateral) - Right Ventricular (RV) systolic function - Tricuspid Regurgitation (TR) gradient – try to get at least a weak signal if a clear curve is not obtained. - Key to measure Left ventricular ejection time (LVET), Duration of mitral inflow, isolvolumic relaxation time (IVRT), isolvolumic contraction time (IVCT) |
|  |  |
| **Subcostal view** | - Inferior vena cava (IVC) diameter |
